# Supplementary material
Source: PubMed Central journal article supplement (PMC3763762)

Anti-VEGF

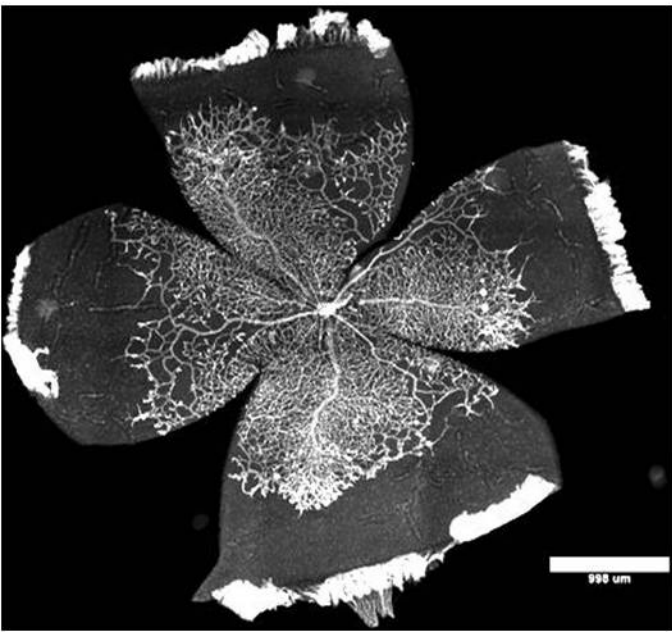

VEGFA-shRNA

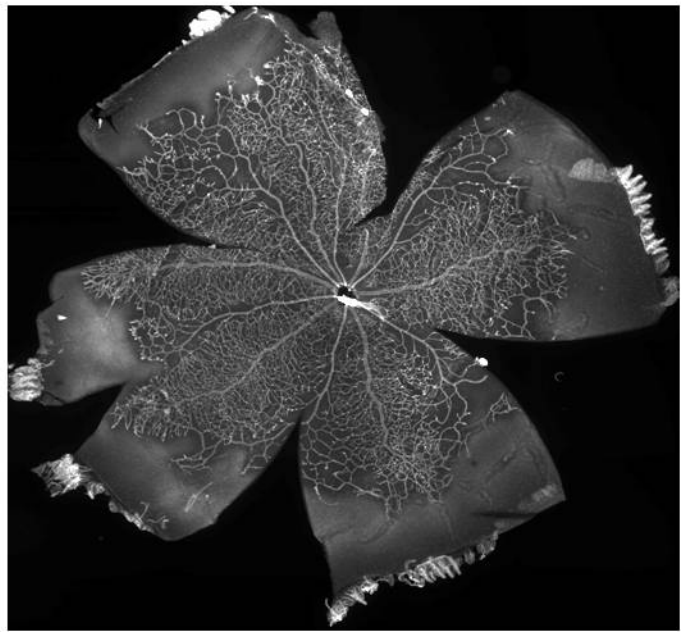

Supplement: mmc1.pdf [file mmc1.pdf]
